# Supplementary material for: Large-sized and highly crystalline ceria nanorods with abundant Ce3+ species achieve efficient intracellular ROS scavenging
Source: Royal Society of Chemistry journal article supplement (doi:10.1039/d4nh00639a), 2025-01-01
Supplement: d4nh00639a1.pdf [file d4nh00639a1.pdf]

## Supplementary Information

### **Large-sized and highly crystalline ceria nanorods with abundant $\text{Ce}^{3+}$ species achieve efficient intracellular ROS scavenging**

Trung Hieu Vu, †<sup>a</sup> Ha-Rim An, †<sup>b</sup> Phuong Thy Nguyen<sup>a</sup>, Jiwon Seo<sup>b</sup> Chang Yeon Kim<sup>b</sup>, Ji-In Park<sup>b</sup>, Byoungchul Son<sup>b</sup>, Hyeran Kim<sup>b</sup>, Hyun Uk Lee<sup>\*b</sup> and Moon Il Kim<sup>\*</sup>

<sup>a</sup>Department of BioNano Technology, Gachon University, 1342 Seongnamdae-ro, Sujeong-gu, Seongnam, Gyeonggi 13120, Republic of Korea

<sup>b</sup>Division of Material Analysis and Research, Korea Basic Science Institute, Gwahak-ro, Yuseong-gu, Daejeon 34133, Republic of Korea

<sup>1</sup>These authors contributed equally to this work.

\*To whom correspondence should be addressed.

Tel.: +82-31-750-8563; Fax: +82-31-750-4748. E-mail: moonil@gachon.ac.kr (M.I. Kim)

Tel.: +82-42-865-3637; Fax: +82-42-865-3640. E-mail: leeho@kbsi.re.kr (H.U. Lee)

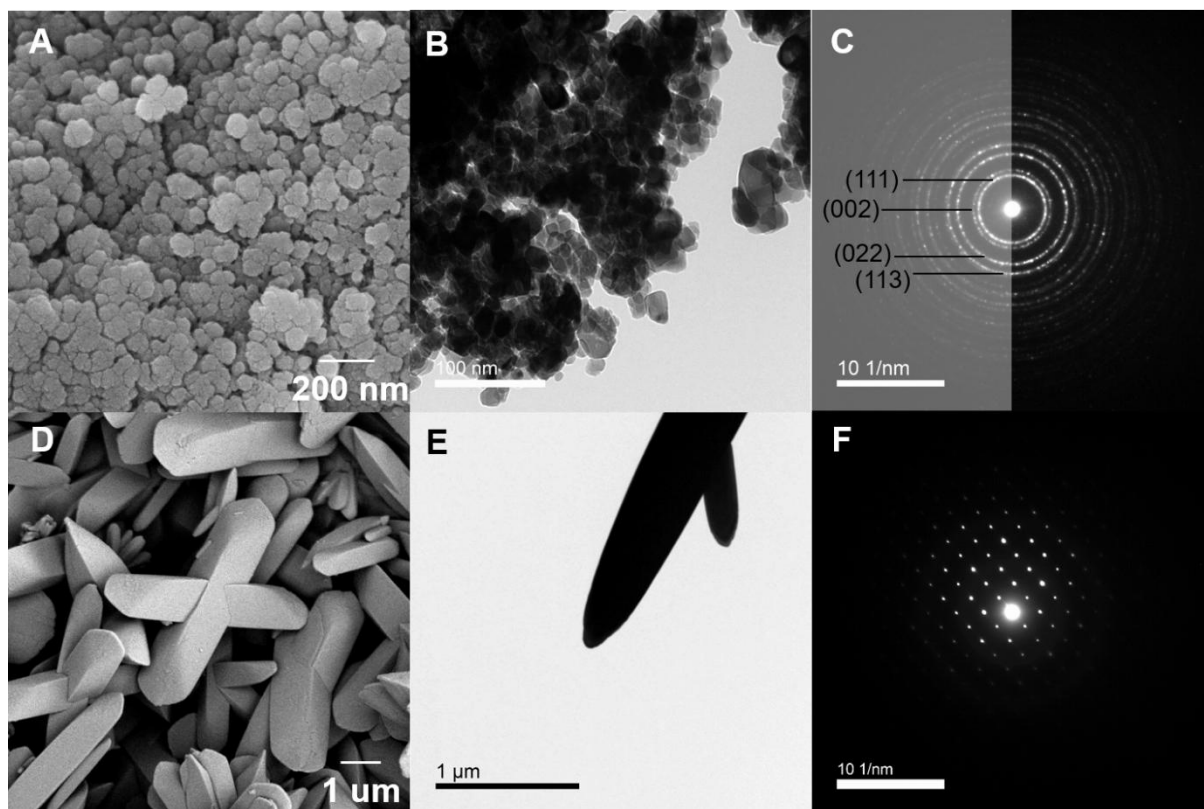

**Fig. S1.** SEM, TEM, and SAED images of (A-C) commercial CeNPs and (D-F) BHT-CeNRs.

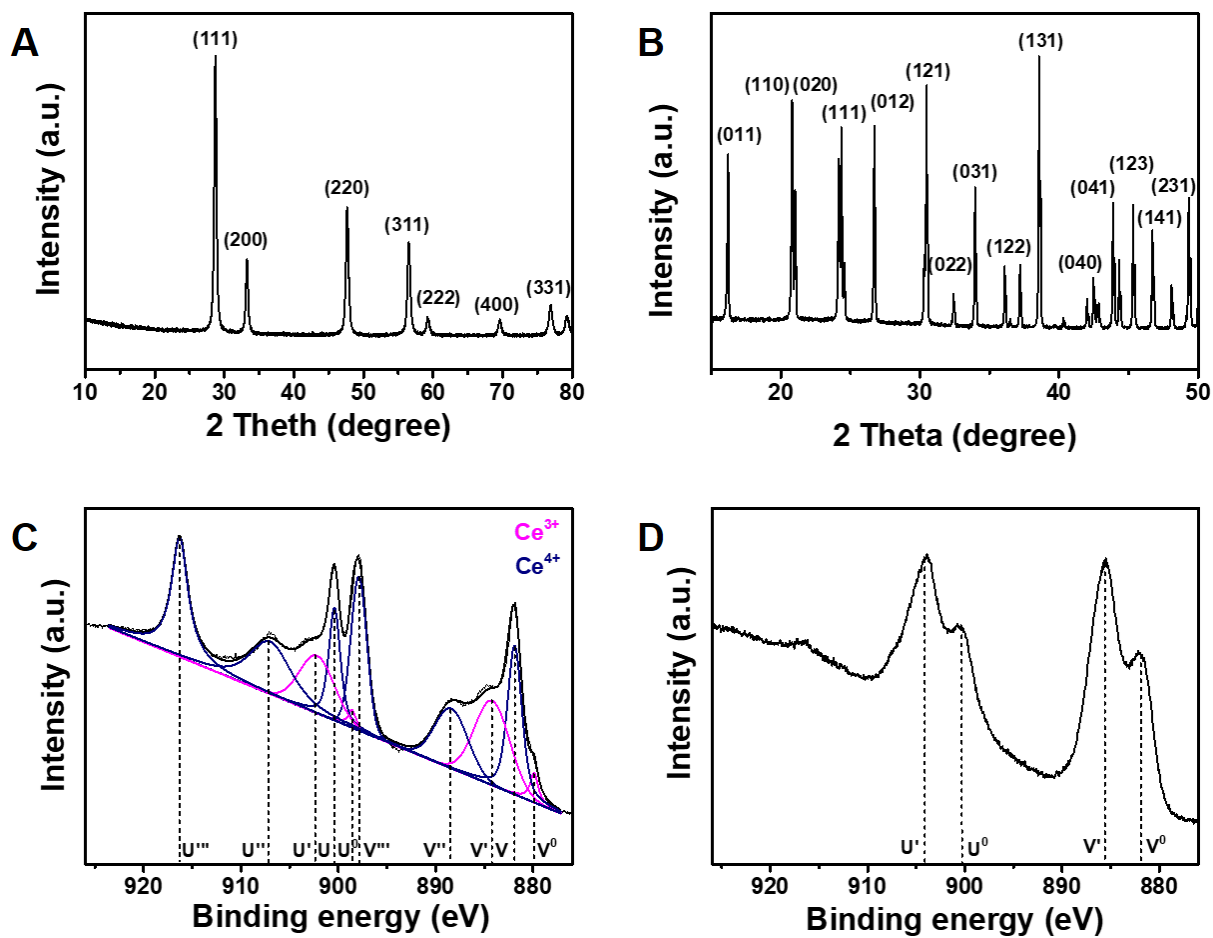

**Fig. S2.** XRD patterns of (A) commercial CeNPs, (B) BHT-CeNRs, XPS spectra of (C) commercial CeNPs, and (D) BHT-CeNRs.

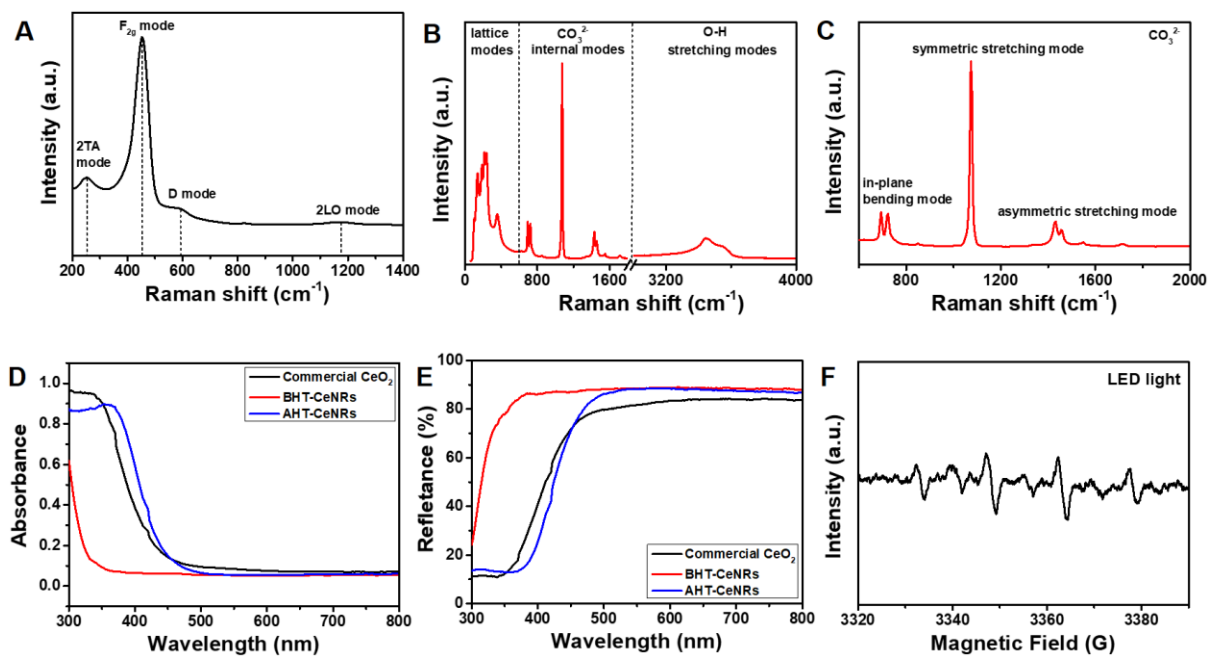

**Fig. S3.** Raman shift of (A) commercial CeNPs, (B-C) BHT-CeNRs, (D) UV-visible absorbance, (E) reflectance, and (F) EPR spectra under UV light irradiation of AHT-CeNRs with DMPO adduct.

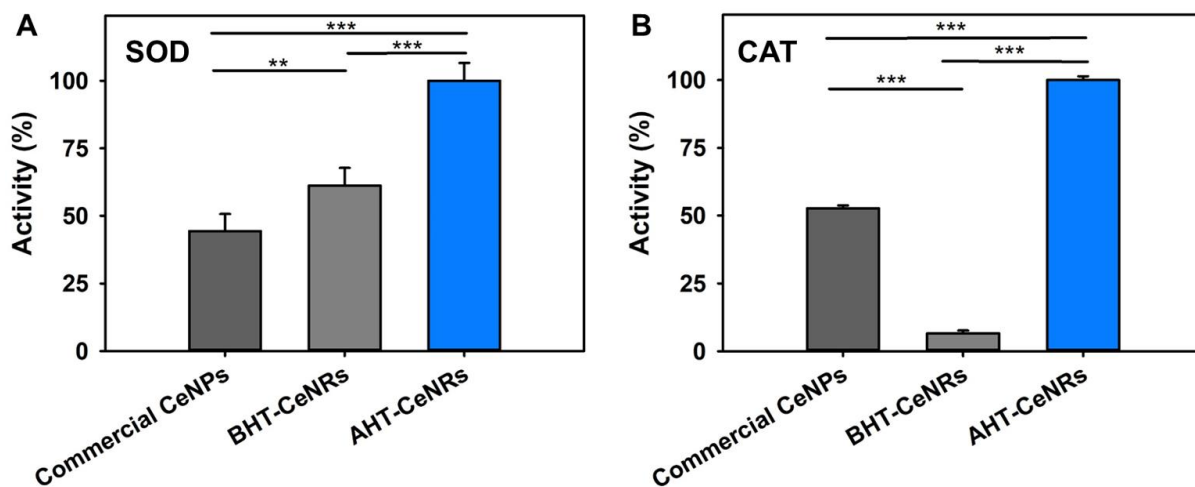

**Fig. S4.** Comparison of (A) SOD-like and (B) CAT-like activities of commercial CeNPs, BHT- and AHT-CeNRs. Data are represented as mean  $\pm$  standard deviation. \*\*\*  $p < 0.001$  when compared to control groups,  $n = 3$ .

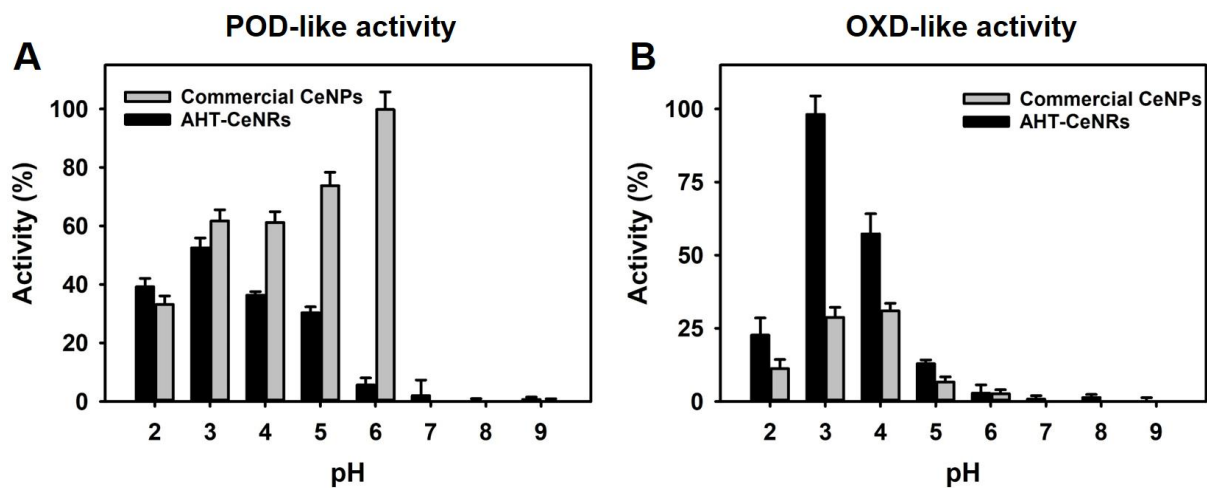

**Fig. S5.** (A) POD- and (B) OXD-like activities of commercial CeNPs and AHT-CeNRs.

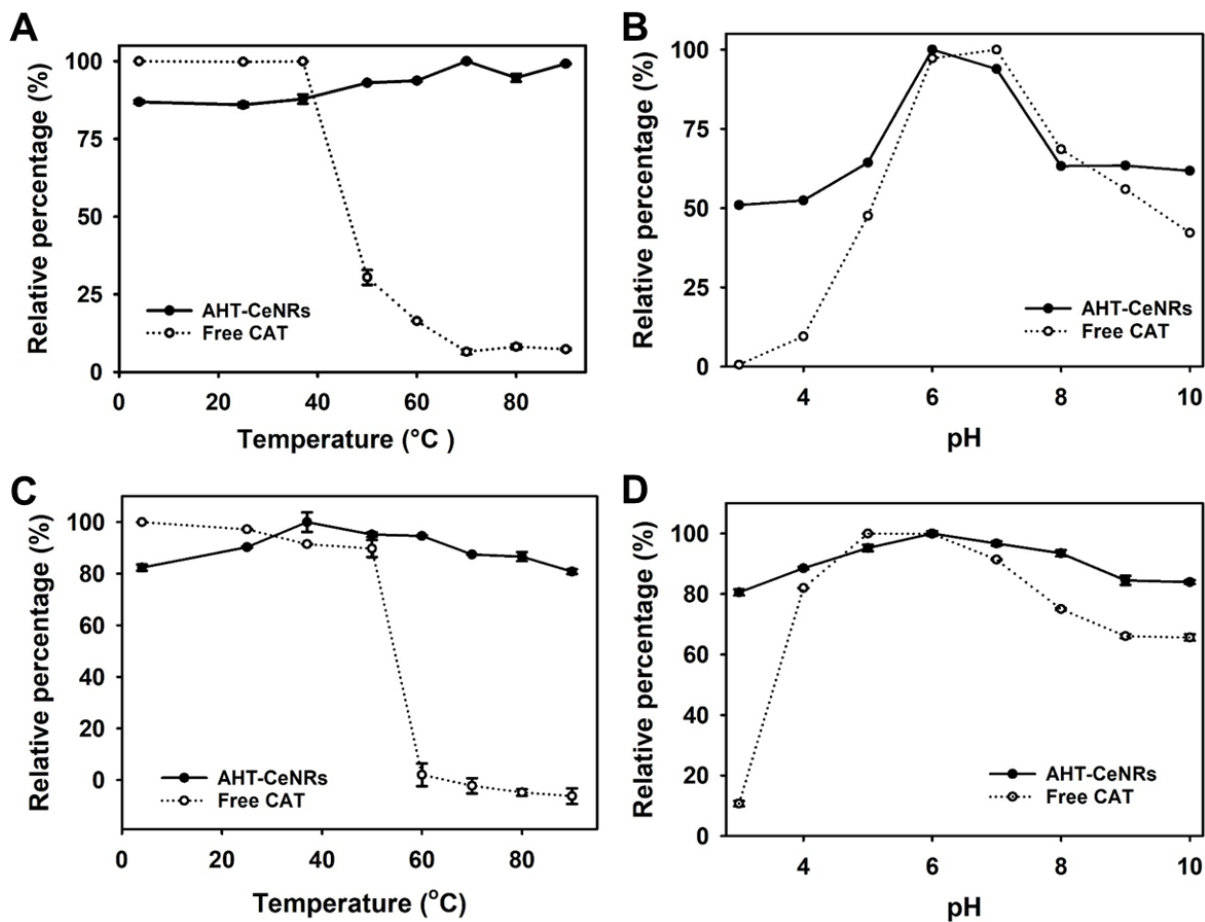

**Fig. S6.** Effects of (A) temperature and (B) pH on the CAT-like activities of AHT-CeNRs and natural CAT. Stabilities in ranges of (C) temperature and (D) pH for CAT-like AHT-CeNRs and natural CAT.

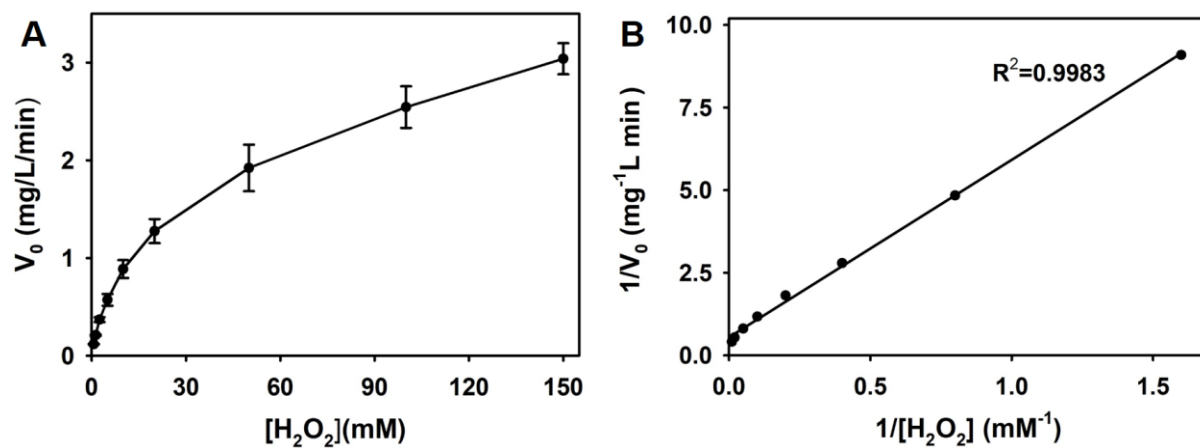

**Fig. S7.** (A) Michaelis–Menten curves for the CAT-like activity of AHT-CeNRs in the presence of  $H_2O_2$ , and (B) the corresponding Lineweaver–Burk plots. Error bars represent the standard deviation ( $n = 3$ ).



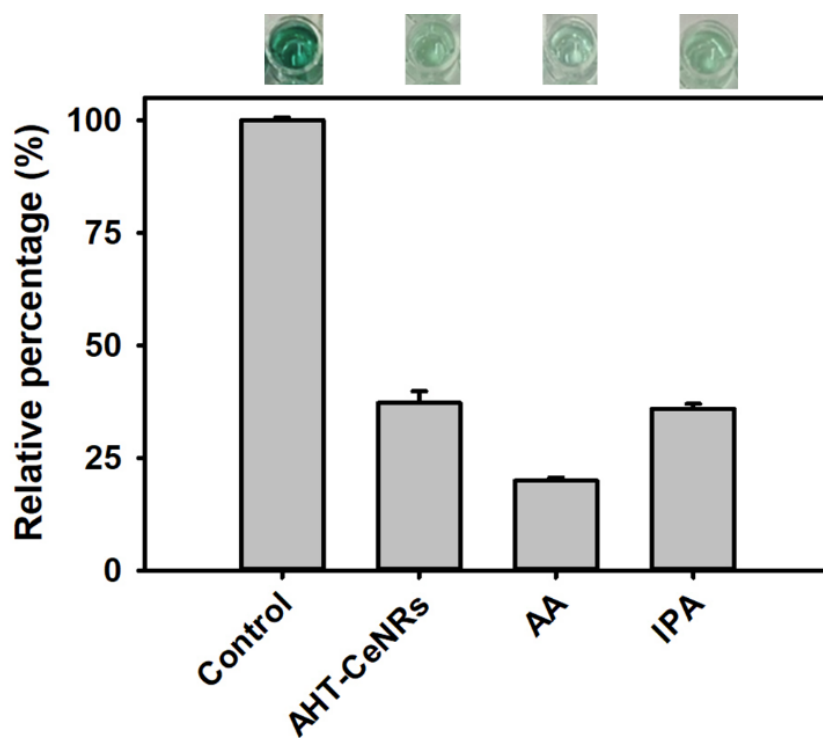

**Fig. S8.** Comparison of relative absorbance at 417 nm with or without radical scavengers (AA, IPA, and AHT-CeNRs) in the ABTS assay. The green color in control was produced by the reaction including 0.2  $\mu\text{g/mL}$  HRP, 100 mM  $\text{H}_2\text{O}_2$ , and 6 mM ABTS.

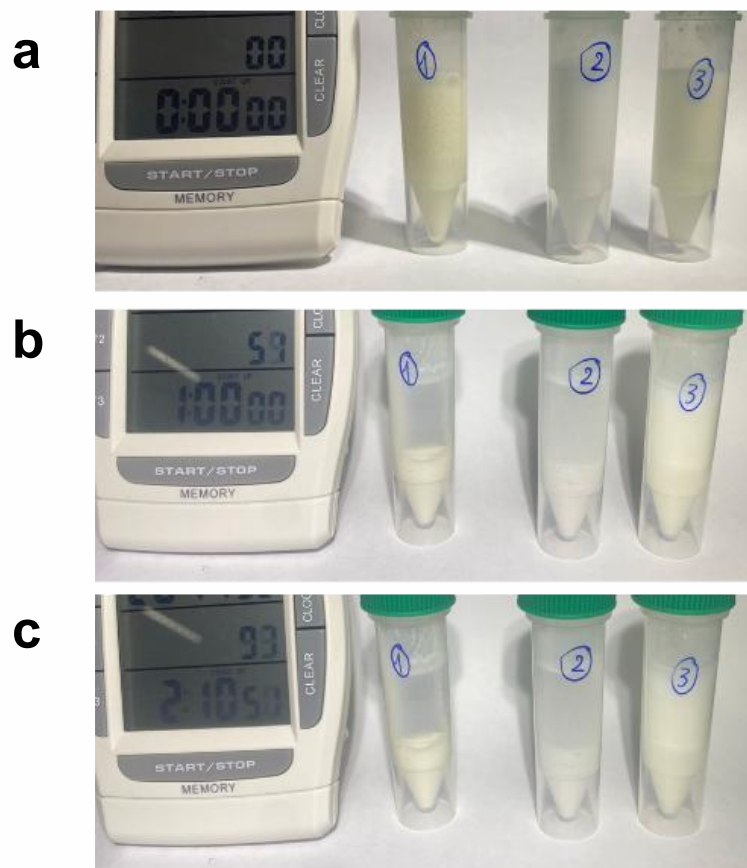

**Fig. S9.** Water dispersibility of (1) commercial CeNPs, (2) BHT-CeNRs, and (3) AHT-CeNRs (a) after ultrasonication for 5 min and undisturbed settling for (b) 1 h and (c) 2 h.

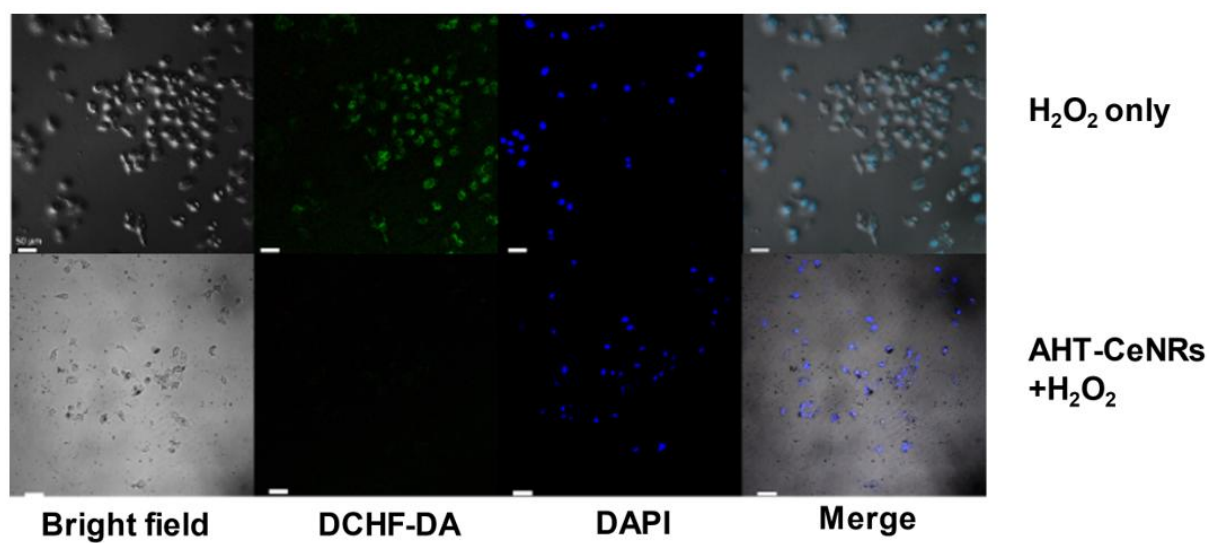

**Fig. S10.** Fluorescent microscopy images of HaCaT cells treated with H<sub>2</sub>O<sub>2</sub> only (5 mM) or H<sub>2</sub>O<sub>2</sub> with AHT-CeNRs (scale bar: 50  $\mu$ m).

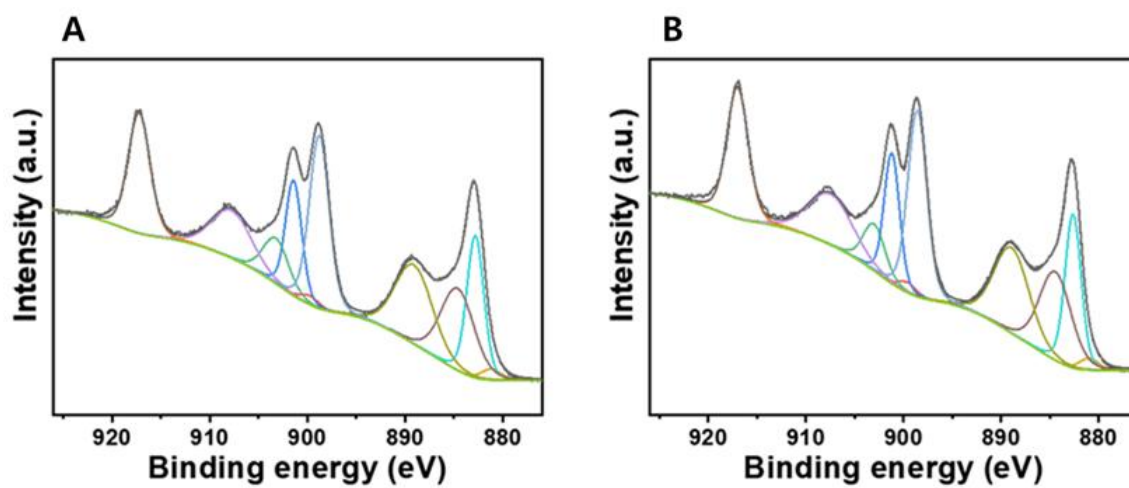

**Fig. S11.** Ce 3d HR-XPS spectra of AHT-CeNRs treated with (a) 0.1 M and (b) 1 M  $\text{H}_2\text{O}_2$ .

**Table S1.** Kinetic parameters of CAT-like AHT-CeNRs and reported values for natural CAT and CAT mimics.

| Catalyst                         | $K_m$ (mM) | $V_{max}$ (mM/s)                                | Reference |
|----------------------------------|------------|-------------------------------------------------|-----------|
| Fe-SANzyme                       | 18.80      | $9.32 \times 10^{-3}$                           | [1]       |
| Natural CAT                      | 52.14      | $1.274 \times 10^{-2}$                          |           |
| Pt-Ft                            | 420.6      | 0.84                                            | [2]       |
| Natural CAT                      | 71.60      | 0.29                                            |           |
| Pd-Ru                            | 31.02      | $8.78 \times 10^{-3}$                           | [3]       |
| Au <sub>24</sub> Ag <sub>1</sub> | 222.42     | $1.15 \times 10^{-3}$                           | [4]       |
| CeO <sub>2</sub> NPs<br>(pH 7.4) | 69.48      | 0.43<br>(mg L <sup>-1</sup> min <sup>-1</sup> ) | [5]       |
| CeO <sub>2</sub> NPs<br>(pH 6.6) | 94.69      | 0.21<br>(mg L <sup>-1</sup> min <sup>-1</sup> ) |           |
| CeO <sub>2</sub> NPs             | 14.96      | -                                               | [6]       |
| AHT-CeNRs                        | 9.8        | $1.89 \times 10^{-2}$                           | This work |

## References

- 1 R. Zhang, B. Xue, Y. Tao, H. Zhao, Z. Zhang, X. Wang, X. Zhou, B. Jiang, Z. Yang, X. Yan, K. Fan, *Adv. Mater.*, 2022, **34**, 39, 2205324, [DOI: 10.1002/adma.202205324](https://doi.org/10.1002/adma.202205324).
- 2 J. Fan, J. J. Yin, B. Ning, X. Wu, Y. Hu, M. Ferrari, G. J. Anderson, J. Wei, Y. Zhao, G. Nie, *Biomaterials*, 2011, **32**, 6, 1611-1618, [DOI: 10.1016/j.biomaterials.2010.11.004](https://doi.org/10.1016/j.biomaterials.2010.11.004).
- 3 J. Ming, T. Zh, J. Li, Z. Ye, C. Shi, Z. Guo, J. Wang, X. Chen, N. Zheng, *Small*, 2021, **17**, 46, 2103645, [DOI: 10.1002/sml.202103645](https://doi.org/10.1002/sml.202103645).
- 4 S. Sun, H. Liu, Q. Xin, K. Chen, H. Ma, S. Liu, X. Mu, W. Hao, S. Liu, Y. Gao, Y. Wang, *Nano Lett.*, 2021, **21**, 6, 2562-2571, [DOI: 10.1021/acs.nanolett.0c05148](https://doi.org/10.1021/acs.nanolett.0c05148).
- 5 Q. Weng, H. Sun, C. Fang, F. Xia, H. Liao, J. Lee, J. Wang, A. Xie, J. Ren, X. Guo, F. Li, *Nat. Commun.*, 2021, **12**, 1, 1436, [DOI: 10.1038/s41467-021-21714-2](https://doi.org/10.1038/s41467-021-21714-2).
- 6 J. K. Sharma, M. Yadav, A. Hazarika, H. S. Yadav, N. Takio, S. Ameen, P. Srivastava, M. S. Akhtar, *Emergent Mater.*, 2022, **5**, 3, 673-682, [DOI: 10.1007/s42247-022-00346-2](https://doi.org/10.1007/s42247-022-00346-2).
