# Supplementary material for: Large-sized and highly crystalline ceria nanorods with abundant Ce3+ species achieve efficient intracellular ROS scavenging
Source: Royal Society of Chemistry journal article supplement (doi:10.1039/d4nh00639a), 2025-01-01
Supplement: d4nh00639a2.pdf [file d4nh00639a2.pdf]

# Support data for figure 5f

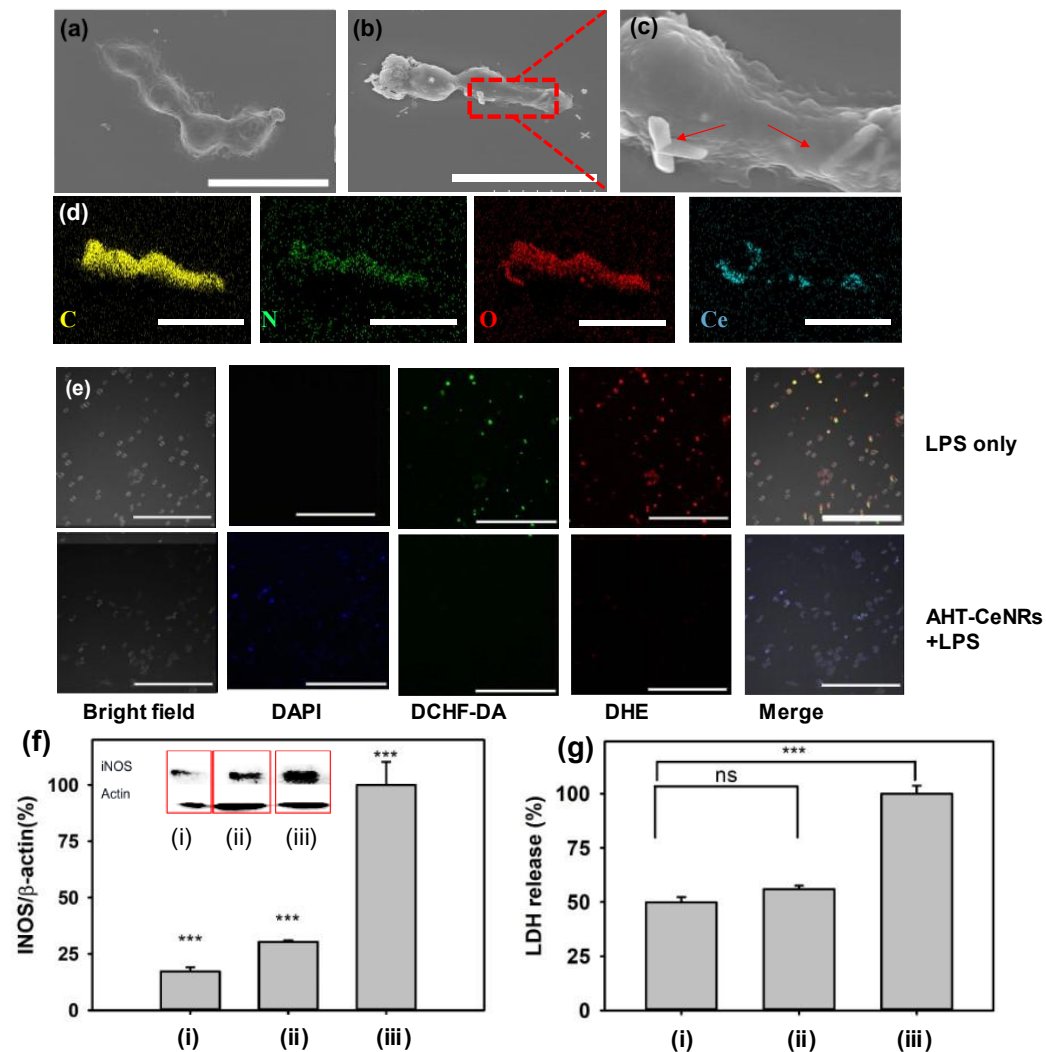

**Figure 5. SEM image of HaCaT cells** (A) non treated, treated with AHT at (B) low and (C) high resolution (red arrows: AHT-CeNRs) scale bar: 30  $\mu\text{m}$  and (D) EDS mapping of cell treated with AHT-CeNRs, scale bar: 20  $\mu\text{m}$ . (E) HaCaT cells were incubated with AHT-CeNRs (0.1 mg/mL) in 6 hours and then stimulators (LPS, 5  $\mu\text{g}/\text{mL}$ ) were added in 1h followed by adding 2'-7'-dichlorofluorescein diacetate (DCHF-DA), dihydroethidium (DHE) as probe for radical oxygen species and DAPI as DNA-specific probe. Scale bar: 100  $\mu\text{m}$ , (F) in vitro Western blot analysis for iNOS, (G) in vitro Lactate dehydrogenase (LDH) assay. \*\*  $P < 0.001$ ; ns: not significant, herein (a): only cells. (b): cells treated with AHT-CeNRs and LPS, and (c) cells treated with LPS)

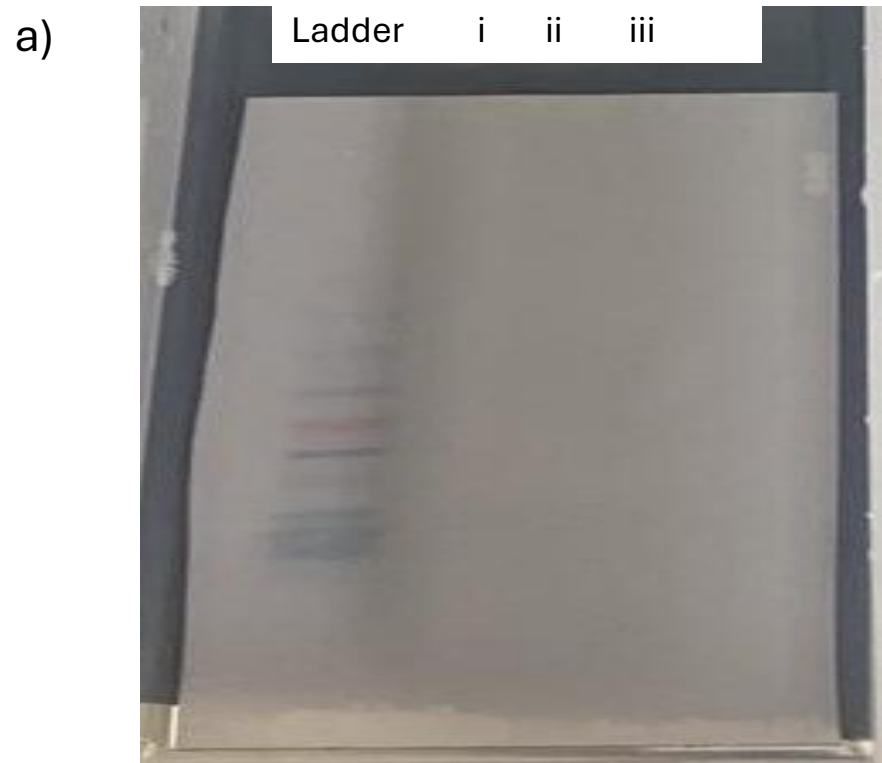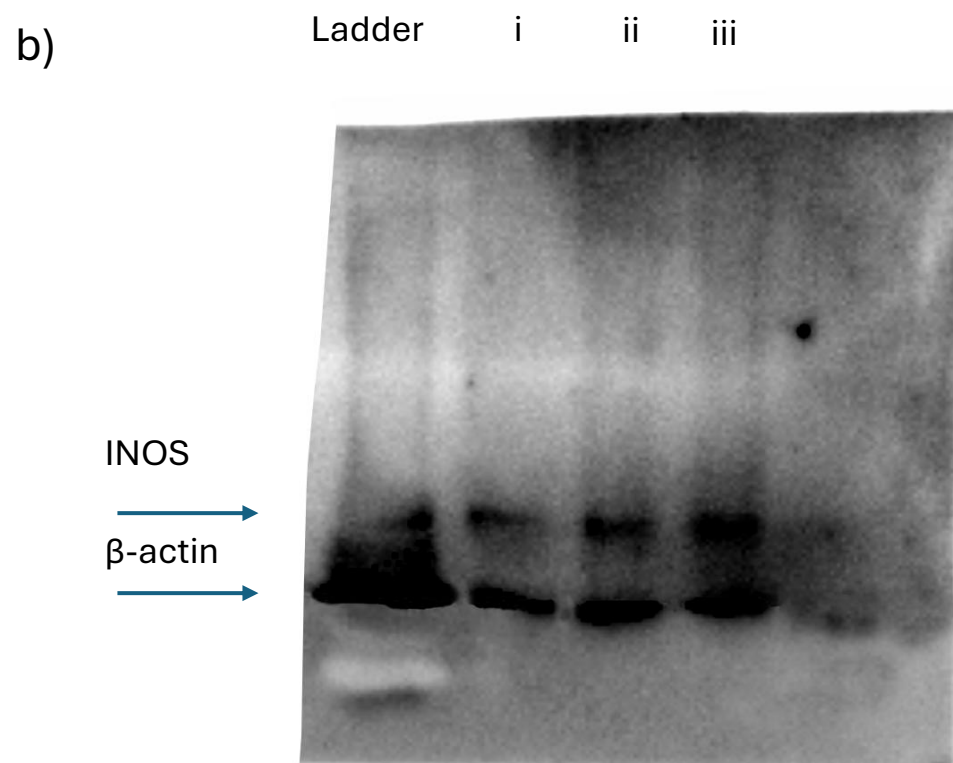

**Fig.** (a) Real image of nitrocellulose membrane after protein transfer step and (b) Chemiluminescence image of the membrane following immunoblotting with INOS and  $\beta$ -actin-specific antibodies and detection by ECL staining
